# Supplementary material for: Reasonable Nitrogen Regime in the Main Crop Increased Grain Yields in Both Main and Ratoon Rice
Source: MDPI journal article supplement (doi:10.3390/agriculture12040527), 2022-04-08
Supplement: s1 [file s1]

Archive with 2 entries (2 files):
- Supplementary Data (figures).pdf
- Supplementary Data (tables).pdf
