# Supplementary material for: Reasonable Nitrogen Regime in the Main Crop Increased Grain Yields in Both Main and Ratoon Rice
Source: MDPI journal article supplement (doi:10.3390/agriculture12040527), 2022-04-08
Supplement: s1 [file s1 › Supplementary Data (tables).pdf]

**Table S1.** Effects of N regime in the main crop on the yield components of the main crop.

| Treatment |             | Panicles ( $10^4 \text{ ha}^{-1}$ ) | Spike panicle <sup>-1</sup> | Filled grain rate (%) | 1000-grain weight (g) |
|-----------|-------------|-------------------------------------|-----------------------------|-----------------------|-----------------------|
| LN        | PN30        | 295.6d                              | 147.1f                      | 69.3a                 | 28.2a                 |
|           | PN40        | 280.2e                              | 150.5e                      | 69.4a                 | 28.3a                 |
|           | PN50        | 270.2f                              | 153.8de                     | 69.5a                 | 28.4a                 |
|           | PN60        | 262.9f                              | 155.3d                      | 69.2a                 | 28.4a                 |
|           | <b>Mean</b> | <b>277.2C</b>                       | <b>151.7C</b>               | <b>69.3A</b>          | <b>28.3A</b>          |
| MN        | PN30        | 315.2b                              | 155.1d                      | 67.5a                 | 28.1a                 |
|           | PN40        | 310.9b                              | 157.7d                      | 67.5a                 | 28.7a                 |
|           | PN50        | 300.2c                              | 158.6d                      | 67.4a                 | 28.9a                 |
|           | PN60        | 291.2d                              | 161.6c                      | 67.4a                 | 28.5a                 |
|           | <b>Mean</b> | <b>304.4B</b>                       | <b>158.2B</b>               | <b>67.5A</b>          | <b>28.5A</b>          |
| HN        | PN30        | 331.6a                              | 156.6d                      | 59.3b                 | 28.2a                 |
|           | PN40        | 325.1a                              | 160.2c                      | 59.4b                 | 28.5a                 |
|           | PN50        | 319.9ab                             | 165.5b                      | 59.5b                 | 28.3a                 |
|           | PN60        | 313.4b                              | 170.8a                      | 59.9b                 | 28.3a                 |
|           | <b>Mean</b> | <b>322.5A</b>                       | <b>163.6A</b>               | <b>59.5B</b>          | <b>28.3A</b>          |

Note: LN, low N rate (the total amount of N applied was  $100 \text{ kg ha}^{-1}$ ); MN, medium N rate (the total amount of N applied was  $250 \text{ kg ha}^{-1}$ ); HN, high N rate (the total amount of N applied was  $400 \text{ kg ha}^{-1}$ ). PN30, PN40, PN50 and PN60, correspond to N application ratio of basal tillering fertilizer to panicle fertilizer of 7:3, 6:4, 5:5 and 4:6, respectively. Data in a column followed by different lower-case letters indicate significant differences at the 5% probability level according to the LSD test. Means followed by different upper-case letters indicate significant differences between the three nitrogen fertilizer levels at the 5% probability level according to the LSD test.
